# Supplementary material for: CHK2 Promotes Metabolic Stress-Induced Autophagy through ULK1 Phosphorylation
Source: MDPI journal article supplement (doi:10.3390/antiox11061166), 2022-06-14
Supplement: s1 [file s1]

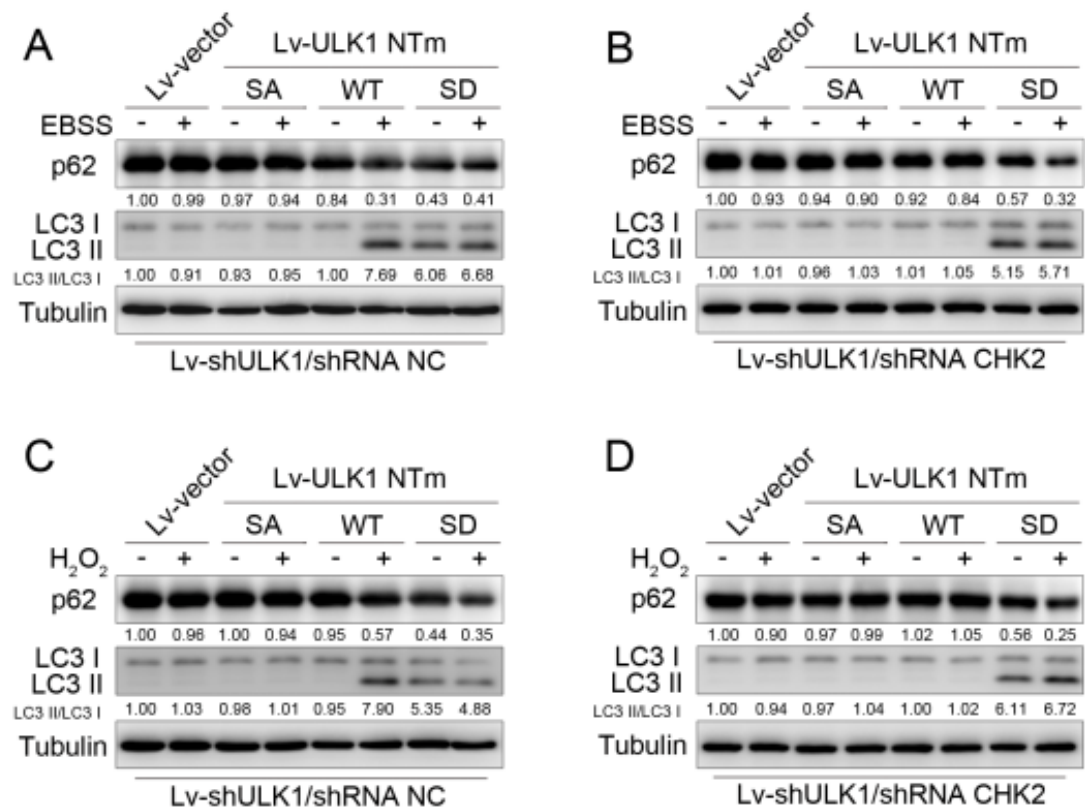

**Figure S1.** CHK2-mediated ULK1 phosphorylation promotes autophagy. (A,B) Western blot analysis of p62 and LC3 in HEK293 cells with reconstituted expression of ULK1 WT, S556A mutant, or S556D mutant treated with EBSS for 3 h with (A) or without (B) CHK2. (C,D) Western blot analysis of p62 and LC3 in HEK293 cells with reconstituted expression of ULK1 WT, S556A mutant, or S556D mutant treated with H<sub>2</sub>O<sub>2</sub> (500 μM) for 3 h with (D) or without (E) CHK2.

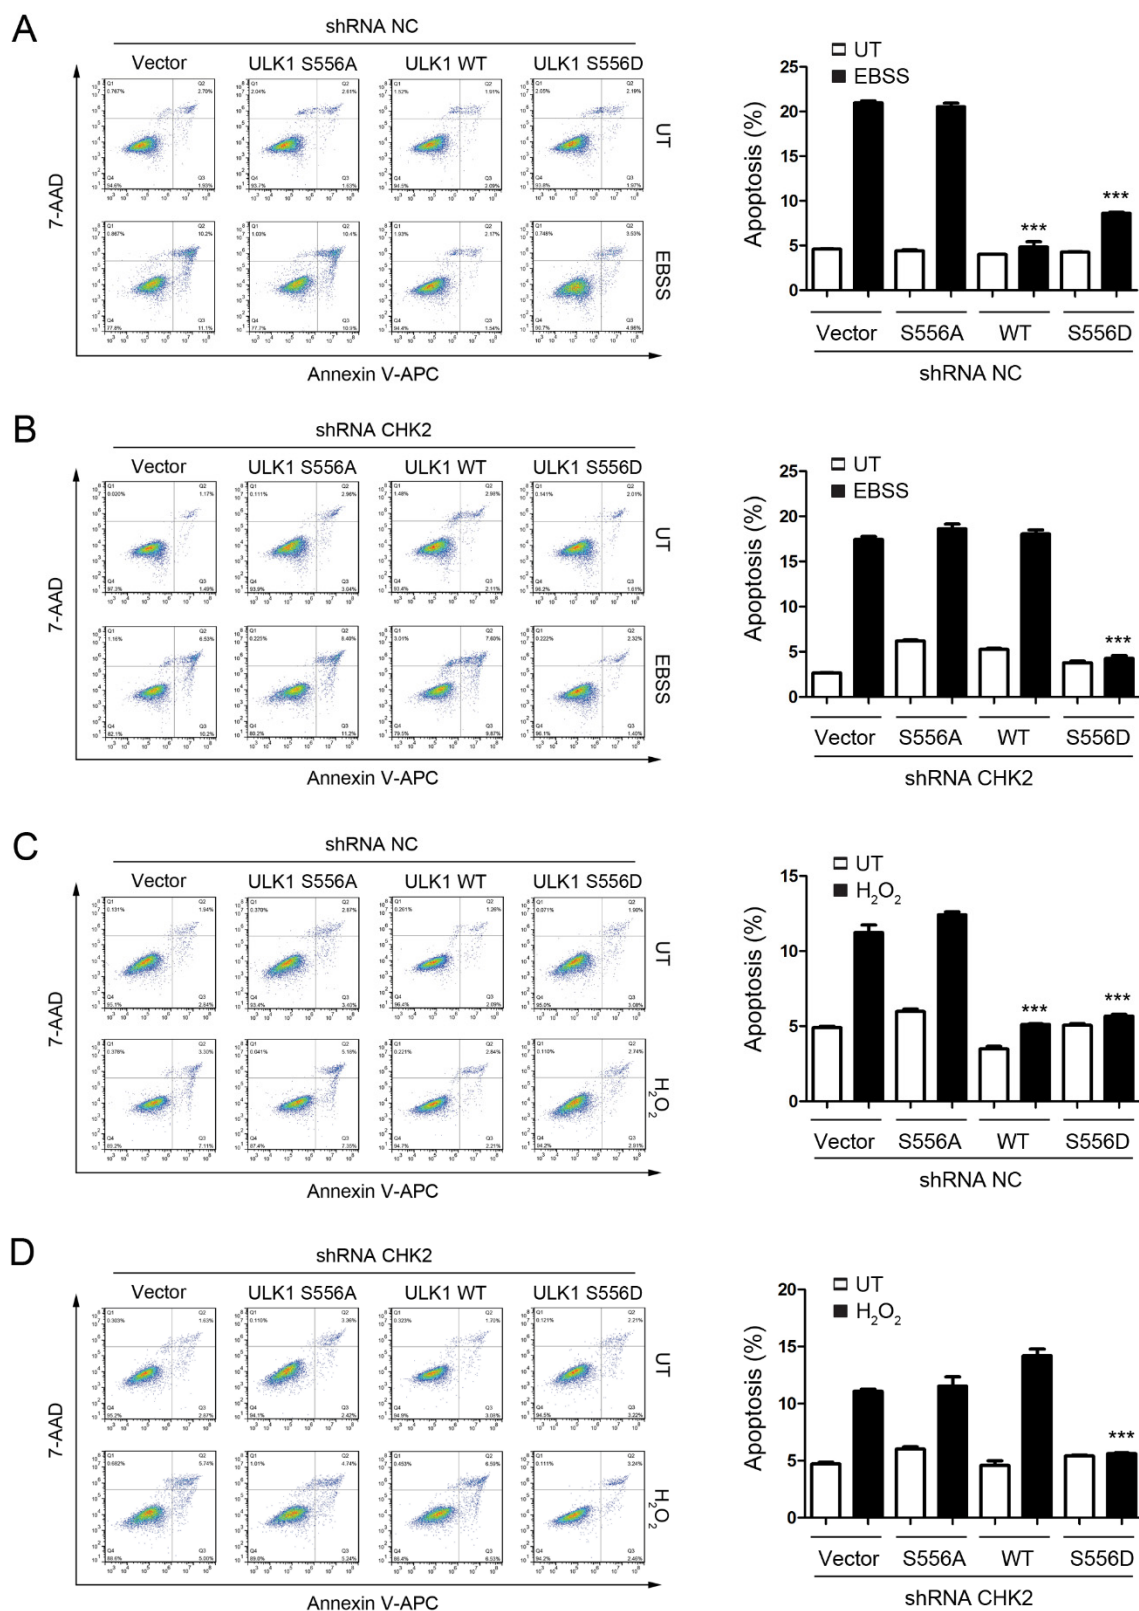

**Figure S2.** CHK2-ULK1 mediated autophagy protects cells against metabolic stress-induced cell death. (A,B) Flow cytometry analysis of apoptosis was performed in HEK293 cells expressing the

indicated plasmids treated with EBSS for 8 h with (A) or without (B) CHK2. The results from three independent experiments are presented as mean  $\pm$  SEM. \*\*\*  $p < 0.001$  compared to ULK1 S556A treated with EBSS. (C,D) Flow cytometry analysis of apoptosis was performed in HEK293 cells expressing the indicated plasmids treated with H<sub>2</sub>O<sub>2</sub> (500  $\mu$ M) for 6 h with (C) or without (D) CHK2. The results from three independent experiments are presented as mean  $\pm$  SEM. \*\*\*  $p < 0.001$  compared to ULK1 S556A treated with H<sub>2</sub>O<sub>2</sub> (500  $\mu$ M) stimulation.

Filename: antioxidants-1718541-supplementary.docx  
Directory: E:\6.13\sensors-1740256  
Template: C:\Users\MDPI\AppData\Roaming\Microsoft\Templates\Normal.dot  
m  
Title:  
Subject:  
Author: guoqiqiang  
Keywords:  
Comments:  
Creation Date: 5/17/2022 9:17:00 AM  
Change Number: 224  
Last Saved On: 6/14/2022 9:00:00 AM  
Last Saved By: MDPI  
Total Editing Time: 2,611 Minutes  
Last Printed On: 6/14/2022 2:10:00 PM  
As of Last Complete Printing  
Number of Pages: 3  
Number of Words: 195 (approx.)  
Number of Characters: 982 (approx.)
